# Supplementary material
Source: PubMed Central journal article supplement (PMC2803112)
Supplement: NIHMS103971-supplement-01.pdf [file NIHMS103971-supplement-01.pdf]

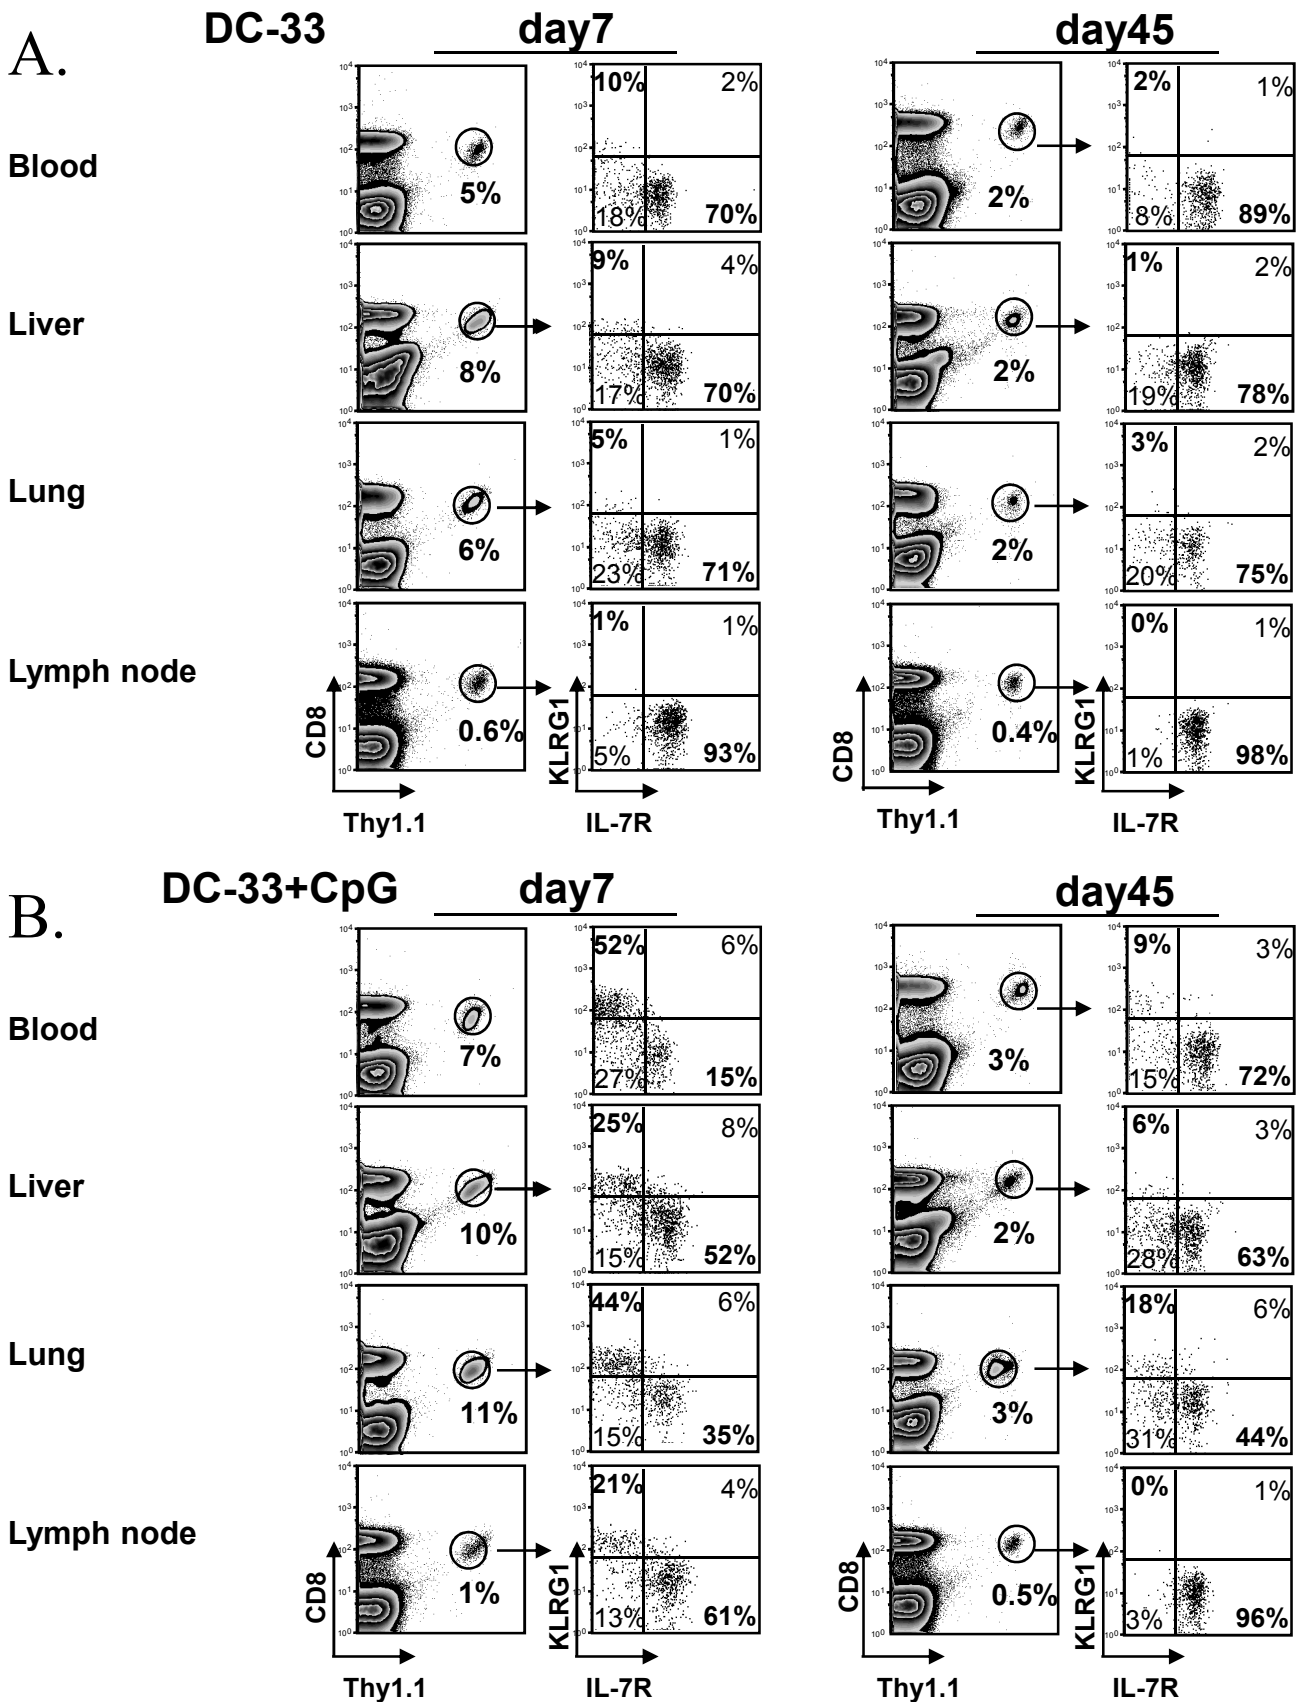

**Supplementary figure 1. Effector and memory CD8 T cell formation in lymphoid and non-lymphoid organs during DC vaccination.** P14 chimeric mice were immunized with DC-33 alone or with CpG-B ODN. FACS plots show expression of KLRG1 and IL-7R on Thy1.1<sup>+</sup> P14 CD8 T cells days 7 and 45 post-immunization from blood, livers, lungs and lymph nodes. The percentage of P14 CD8 T cells within the total CD8 T cell population is indicated on contour plots. Data are representative of three independent experiments.
